# Supplementary material for: Dendritic cell-derived nitric oxide inhibits the differentiation of effector dendritic cells
Source: PubMed Central journal article supplement (PMC5342705; doi:10.18632/oncotarget.11361), 2016-08-18
Supplement: oncotarget-07-74834-s001.pdf [file oncotarget-07-74834-s001.pdf]

## Dendritic cell-derived nitric oxide inhibits the differentiation of effector dendritic cells

### SUPPLEMENTARY FIGURES

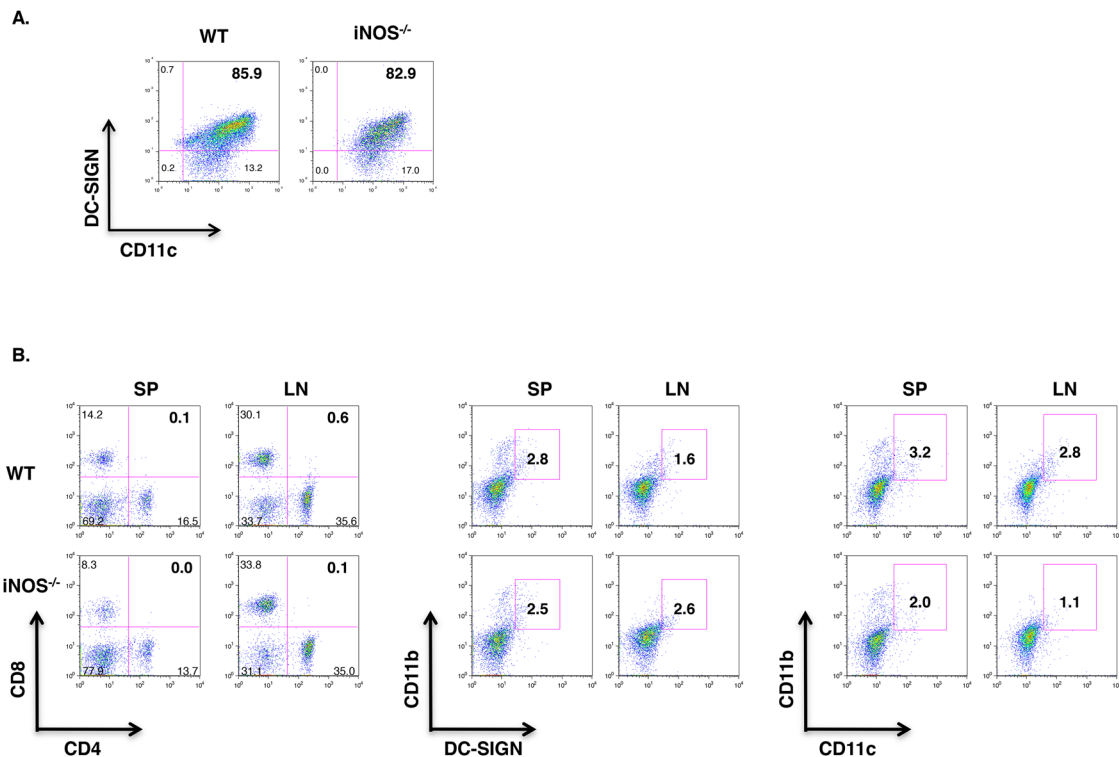

**Supplementary Figure S1: T cells and DCs development in iNOS-deficient mice was comparable with that in WT mice.** **A.** Bone marrow cells from WT and iNOS<sup>-/-</sup> mice were cultured with GM-CSF (10ng/ml) and IL-4 (10ng/ml) for 7 days, and DC cell markers were analyzed by FACS. **B.** CD4<sup>+</sup> and CD8<sup>+</sup> T cells population and DCs percentage in spleen and lymph node from WT or iNOS<sup>-/-</sup> mice were analyzed by FACS.

A.

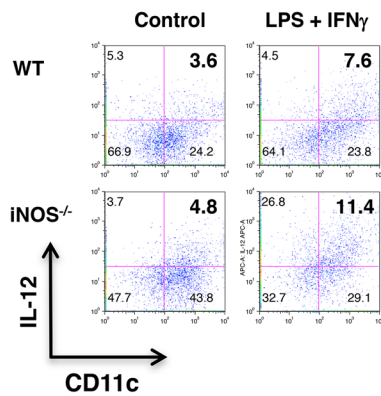

B.

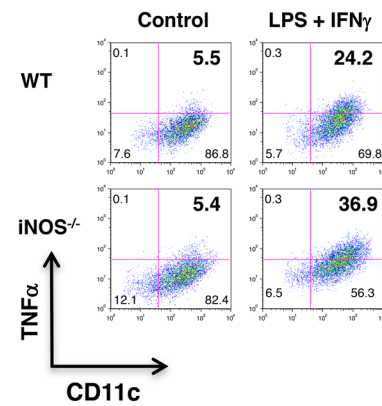

**Supplementary Figure S2: NO suppress effective DCs differentiation.** Bone Marrow DC cells from WT and iNOS<sup>-/-</sup> mice were stimulated with IFN- $\gamma$  plus LPS for overnight, IL-12 **A.** or TNF $\alpha$  **B.** expression in CD11b<sup>+</sup>CD11c<sup>+</sup> DCs were analyzed by FACS.

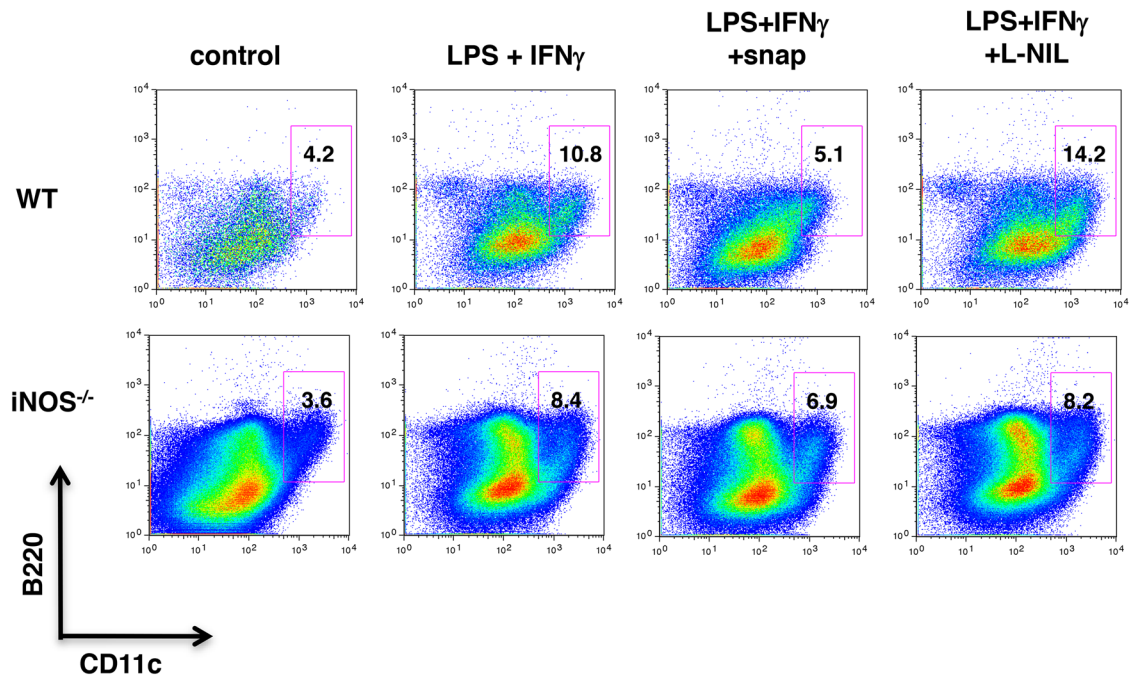

**Supplementary Figure S3: NO did not affect pDC differentiation in short time.** Bone Marrow cells from WT and iNOS<sup>-/-</sup> mice were stimulated with IFN- $\gamma$  plus LPS for overnight in the presence of SNAP or L-NIL, CD11c<sup>+</sup>B220<sup>+</sup> pDC percentages were analyzed by FACS.

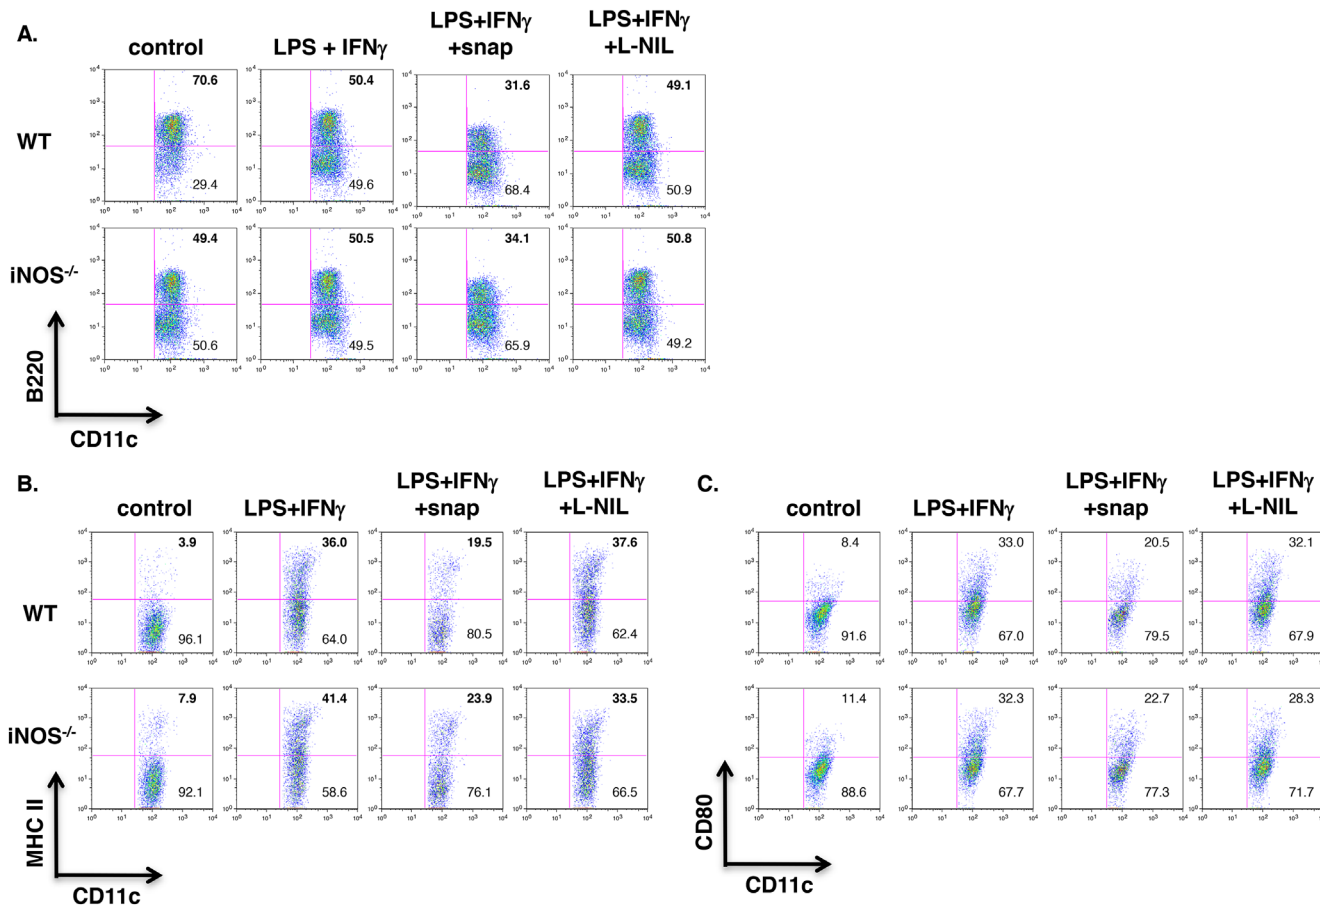

**Supplementary Figure S4: NO suppresses maturation and differentiation of pDC *in vitro*.** Bone Marrow cells from wild type or iNOS<sup>-/-</sup> mice were cultured with Flt3-L for 7 days, then stimulated with IFN- $\gamma$  plus LPS for 24 h, CD11c<sup>+</sup>B220<sup>+</sup> pDC percentages **A.** were analyzed by FACS, and maturation markers including MHC-II<sup>+</sup> **B.** and CD80<sup>+</sup> pDC **C.** were analyzed by FACS.
